# Supplementary material
Source: Springer Nature journal article supplement (https://www.springermedizin.de/resource/supplementary/12885_2009_1774_MOESM2_ESM.pdf/9472902)
Supplement: MOESM2 [file 9472902]

**Table 3: Nested PCR with the PGMY-GP system on previously negative or inconclusive results after primary PCR screen.**

| Sample             | PGMY-GP<br>nested PCR | HPV<br>sequenced | Linear<br>Array |
|--------------------|-----------------------|------------------|-----------------|
| C4                 | +                     | 58               | 52m, 58         |
| C5                 | +                     | 87               | -               |
| V2 <sub>post</sub> | -                     | ND               | 45, 54          |
| V4 <sub>on</sub>   | +                     | 16               | 54              |
| V4 <sub>post</sub> | +                     | 16               | 16, 54          |
| V6 <sub>on</sub>   | +                     | 81               | 81              |
| V6 <sub>post</sub> | +                     | 16               | 16              |

Samples negative or weakly positive for HPV using any of the three PCR primer sets were re-amplified using a PGMY-GP5+/GP6+ nested approach. Positive samples were directly sequenced to determine HPV type and the result compared to Linear Array.
